# Supplementary material for: Fibroblast-adapted human CMV vaccines elicit predominantly conventional CD8 T cell responses in humans
Source: PubMed Central journal article supplement — J Exp Med. 2017 Jul 3;214(7):1889–99. doi: 10.1084/jem.20161988 (PMC5502433; doi:10.1084/jem.20161988), 2017-07-03
Supplement: JEM_20161988_sm.pdf [file JEM_20161988_sm.pdf]

SUPPLEMENTAL MATERIAL

Murray et al., <https://doi.org/10.1084/jem.20161988>

Table S1. Summary of CD8 T cell responses to vaccination

| Subject | Chimera/ dose (PFU) | IE-1 15mer response | Core epitopes     | Defined HLA restriction <sup>a</sup> | Potential HLA restriction | HLA                                    |
|---------|---------------------|---------------------|-------------------|--------------------------------------|---------------------------|----------------------------------------|
| 23      | 4/10 <sup>2</sup>   | 22                  | QIKVRVDMV         | B08                                  |                           | A1:01; B8:01; C7:01                    |
| 36      | 4/10 <sup>3</sup>   | 49                  | ELKRKMMYM         | B08                                  |                           | A1:01,32:01; B8:01,18:01; C7:01        |
|         |                     | 22                  | QIKVRVDMV         | B08                                  |                           |                                        |
|         |                     | 49–50               | ELKRKMMYM         | ~10% B08                             | B18 <sup>b</sup>          |                                        |
| 24      | 4/10 <sup>2</sup>   | 75                  | GAISLLTEF         | Cw3                                  |                           | A2:01,68:02; B44:03,82:01; C3:02,3:03  |
|         |                     | 28                  | 2/10 <sup>3</sup> | 24–25                                | RIKEHMLKK                 |                                        |
| 28      | 2/10 <sup>3</sup>   | 79                  | EETSVMLAK         |                                      | A68 <sup>c</sup>          |                                        |
|         |                     | 79–81               | nd                |                                      |                           |                                        |
| 30      | 2/10 <sup>3</sup>   | 51–52               | YMCYRNIEF         | A2                                   |                           | A2:01,29:02; B44:02,44:03; C5:01,16:01 |
| 34      | 4/10 <sup>3</sup>   | 68                  | nd                | A2                                   |                           | A2:01,33:01; B14:02,18:01; C7:01,8:02  |
|         |                     | 49–50 <sup>d</sup>  | DELKRKMMY         |                                      | B18 <sup>b</sup>          |                                        |

Abbreviation used: nd, not determined.

<sup>a</sup>Assessed by peptide pulsing single HLA transfectants.

<sup>b</sup>Based on predicted IC50 of 505.8 nM for binding of DELKRKMM to HLA-B18:01, predicted IC50 of 199.5 nM for binding of DELKRKMMYM to HLA-B18:01, and predicted IC50 of 96.7 nM for binding of DELKRKMMY to HLA-B18:01 (<http://tools.iedb.org/main/>; Hoof et al., 2009).

<sup>c</sup>Based on preference of HLA-A68, but not other MHC Ia molecules, for a C' lysine (Guo et al., 1992) and predicted IC50 of 14.5 nM for binding of ETSVMLAK to HLA-A68:01 (<http://tools.iedb.org/main/>; Hoof et al., 2009).

<sup>d</sup>The response of subject 34 to the DY9 peptide was not characterized with respect to MHC II or HLA-E restriction because the T cell line could not be maintained.

REFERENCES

Guo, H.-C., T.S. Jardetzky, T.P. Garrett, W.S. Lane, J.L. Strominger, and D.C. Wiley. 1992. Different length peptides bind to HLA-Aw68 similarly at their ends but bulge out in the middle. *Nature*. 360:364–366. <http://dx.doi.org/10.1038/360364a0>

Hoof, I., B. Peters, J. Sidney, L.E. Pedersen, A. Sette, O. Lund, S. Buus, and M. Nielsen. 2009. NetMHCpan, a method for MHC class I binding prediction beyond humans. *Immunogenetics*. 61:1–13. <http://dx.doi.org/10.1007/s00251-008-0341-z>
